# Supplementary material
Source: PubMed Central journal article supplement (PMC5345607)
Supplement: hdy2016114x1.pdf [file hdy2016114x1.pdf]

SUPPLEMENTAL MATERIAL

1  
2  
3  
4  
5  
6  
7  
8  
9  
10  
11  
12  
13  
14  
15  
16  
17  
18  
19  
20  
21  
22

Temporal stability in patterns of genetic diversity and structure of a marine foundation species (*Zostera marina*)

Laura K. Reynolds  
John J. Stachowicz  
A. Randall Hughes  
Stephanie J. Kamel  
Brian S. Ort  
Richard K. Grosberg

S1. Supplementary data analysis  
Table S1 Pairwise  $F_{ST}$  and Jost  $D_{ST}$  values for historical and present sample  
Figure S1 *Z. marina* sampling locations  
Figure S2 *Z. marina* allele frequencies from Bodega and Tomales Bays  
Figure S3 *Z. marina* Bayesian clustering analysis from Bodega and Tomales Bays  
Figure S4 *Z. marina* allele frequencies from San Francisco Bay  
Figure S5 *Z. marina* Bayesian clustering analysis from San Francisco Bay  
Figure S6 *Z. marina* allele frequencies from the Virginia coastal bays  
Figure S7 *Z. marina* Bayesian clustering analysis from the Virginia coastal bays  
Figure S8 *Z. marina* population differentiation at two sampling times

|            |         | Historical   |              |              |              |              |              |              |              | Present      |              |              |              |              |              |              |       |
|------------|---------|--------------|--------------|--------------|--------------|--------------|--------------|--------------|--------------|--------------|--------------|--------------|--------------|--------------|--------------|--------------|-------|
|            |         | WTB          |              | ETB          |              | BB           |              | SFB          |              | WTB          |              | ETB          |              | BB           |              | SFB          |       |
|            |         | BL           | CG           | MB           | SL           | WP           | CM           | KB           | CB           | BL           | CG           | MB           | SL           | WP           | CM           | KB           | CB    |
| Historical | WTB     |              | 0.062        | 0.080        | 0.138        | 0.148        | 0.112        | 0.407        | 0.356        | 0.023        | 0.054        | 0.051        | 0.090        | 0.075        | 0.071        | 0.363        | 0.380 |
|            | CG      | <b>0.039</b> |              | 0.029        | 0.052        | 0.208        | 0.231        | 0.466        | 0.432        | 0.016        | 0.029        | 0.031        | 0.057        | 0.141        | 0.157        | 0.426        | 0.458 |
|            | MB      | <b>0.053</b> | <b>0.017</b> |              | 0.104        | 0.286        | 0.300        | 0.483        | 0.440        | 0.072        | 0.097        | 0.044        | 0.122        | 0.191        | 0.200        | 0.444        | 0.452 |
|            | SL      | <b>0.128</b> | <b>0.104</b> | <b>0.129</b> |              | 0.208        | 0.291        | 0.693        | 0.677        | 0.055        | 0.048        | 0.058        | 0.020        | 0.198        | 0.198        | 0.671        | 0.693 |
|            | WP      | <b>0.111</b> | <b>0.191</b> | <b>0.203</b> | <b>0.114</b> |              | 0.018        | 0.418        | 0.474        | 0.115        | 0.164        | 0.238        | 0.207        | 0.030        | 0.043        | 0.461        | 0.424 |
|            | CM      | <b>0.127</b> | <b>0.238</b> | <b>0.234</b> | <b>0.166</b> | 0.005        |              | 0.306        | 0.328        | 0.124        | 0.174        | 0.249        | 0.227        | 0.022        | 0.044        | 0.322        | 0.318 |
|            | KB      | <b>0.440</b> | <b>0.527</b> | <b>0.494</b> | <b>0.521</b> | <b>0.427</b> | <b>0.431</b> |              | 0.069        | 0.513        | 0.526        | 0.539        | 0.620        | 0.347        | 0.421        | 0.042        | 0.010 |
|            | CB      | <b>0.442</b> | <b>0.536</b> | <b>0.503</b> | <b>0.535</b> | <b>0.432</b> | <b>0.436</b> | <b>0.109</b> |              | 0.425        | 0.511        | 0.510        | 0.589        | 0.371        | 0.437        | 0.062        | 0.004 |
|            | BL      | <b>0.022</b> | <b>0.034</b> | <b>0.055</b> | <b>0.060</b> | <b>0.097</b> | <b>0.130</b> | <b>0.454</b> | <b>0.460</b> |              | 0.004        | 0.028        | 0.027        | 0.057        | 0.061        | 0.451        | 0.424 |
|            | Present | CG           | <b>0.035</b> | 0.013        | <b>0.039</b> | <b>0.072</b> | <b>0.140</b> | <b>0.186</b> | <b>0.478</b> | <b>0.484</b> | 0.002        |              | 0.027        | 0.007        | 0.102        | 0.096        | 0.532 |
| MB         |         | <b>0.035</b> | 0.000        | 0.009        | <b>0.099</b> | <b>0.180</b> | <b>0.222</b> | <b>0.520</b> | <b>0.532</b> | <b>0.032</b> | <b>0.022</b> |              | 0.033        | 0.153        | 0.156        | 0.538        | 0.500 |
| SL         |         | <b>0.088</b> | <b>0.077</b> | <b>0.101</b> | 0.001        | <b>0.094</b> | <b>0.136</b> | <b>0.498</b> | <b>0.508</b> | <b>0.029</b> | <b>0.046</b> | <b>0.078</b> |              | 0.158        | 0.147        | 0.631        | 0.585 |
| WP         |         | <b>0.079</b> | <b>0.151</b> | <b>0.159</b> | <b>0.106</b> | 0.007        | 0.012        | <b>0.415</b> | <b>0.420</b> | <b>0.060</b> | <b>0.101</b> | <b>0.140</b> | <b>0.073</b> |              | 0.004        | 0.340        | 0.363 |
| CM         |         | <b>0.091</b> | <b>0.167</b> | <b>0.184</b> | <b>0.131</b> | <b>0.018</b> | <b>0.023</b> | <b>0.415</b> | <b>0.416</b> | <b>0.075</b> | <b>0.117</b> | <b>0.164</b> | <b>0.093</b> | 0.000        |              | 0.406        | 0.434 |
| KB         |         | <b>0.436</b> | <b>0.526</b> | <b>0.490</b> | <b>0.516</b> | <b>0.422</b> | <b>0.423</b> | 0.005        | <b>0.092</b> | <b>0.449</b> | <b>0.474</b> | <b>0.516</b> | <b>0.494</b> | <b>0.407</b> | <b>0.412</b> |              | 0.045 |
| CB         |         | <b>0.455</b> | <b>0.550</b> | <b>0.517</b> | <b>0.550</b> | <b>0.447</b> | <b>0.454</b> | <b>0.061</b> | 0.005        | <b>0.474</b> | <b>0.497</b> | <b>0.548</b> | <b>0.523</b> | <b>0.435</b> | <b>0.427</b> | <b>0.073</b> |       |

24 Table S1. *Z. marina* pairwise Jost DST (above diagonal) and  $F_{ST}$  (below diagonal) values for historical and present samples collected  
 25 from West Tomales Bay (WTB), East Tomales Bay (ETB), Bodega Bay (BB), and San Francisco Bay (SFB). BL=Blake's Landing,  
 26 CG=Cypress Grove, MB=Marshall Beach, SL=Sacramento Landing, WP=Westside Park, CM=Channel Marker, KB=Keller Beach,  
 27 CB=Crown Beach. Bold  $F_{ST}$  values are not significantly different from zero.

| Region | Site | Tidal Height | r<br>(across all genets) | r<br>(mean of quadrats) |
|--------|------|--------------|--------------------------|-------------------------|
| WTB    | MB   | HI           | 0.15                     | 0.35                    |
|        |      | S            | 0.04                     | 0.06                    |
|        | SL   | HI           | 0.29                     | 0.32                    |
|        |      | S            | 0.08                     | 0.19                    |
| ETB    | BL   | HI           | 0.15                     | 0.20                    |
|        |      | S            | 0.21                     | 0.23                    |
|        | CG   | HI           | 0.12                     | 0.20                    |
|        |      | S            | 0.30                     | 0.25                    |
| BB     | WP   | HI           | -0.04                    | 0.02                    |
|        |      | S            | 0.08                     | 0.19                    |
|        | CM   | HI           | 0.03                     | 0.03                    |
|        |      | S            | -0.06                    | -0.06                   |

28  
 29 Table S2. *Z. marina* within-group relatedness values for each tidal height. Relatedness (r) was calculated using all genets within a tidal  
 30 height and also using the mean relatedness of all genets within a 1m<sup>2</sup> quadrat (n=4). BL=Blake's Landing, CG=Cypress Grove,  
 31 MB=Marshall Beach, SL=Sacramento Landing, WP=Westside Park, CM=Channel Marker, KB=Keller Beach, CB=Crown Beach.

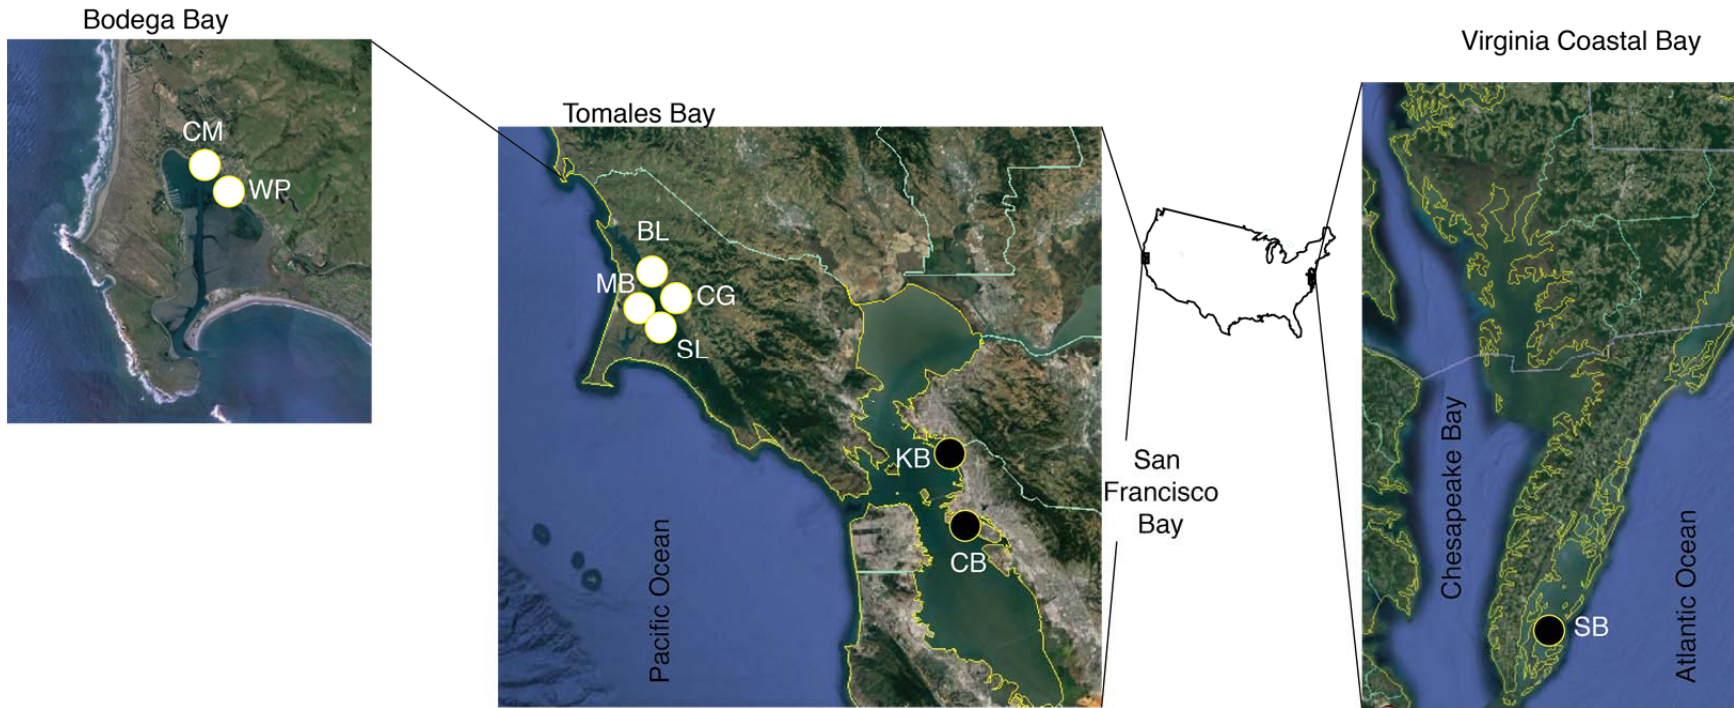

32  
 33 Fig. S1. Map of *Z. marina* sampling locations. Dark circles represent sites where samples were collected by a haphazard swim. White  
 34 circles represent locations where replicate 1m<sup>2</sup> quadrats (n=4) at the high intertidal and subtidal were established for sample  
 35 collections. BL=Blake's Landing, CG=Cypress Grove, MB=Marshall Beach, SL=Sacramento Landing, WP=Westside Park,  
 36 CM=Channel Marker, KB=Keller Beach, CB=Crown Beach, SB=South Bay.

37

38

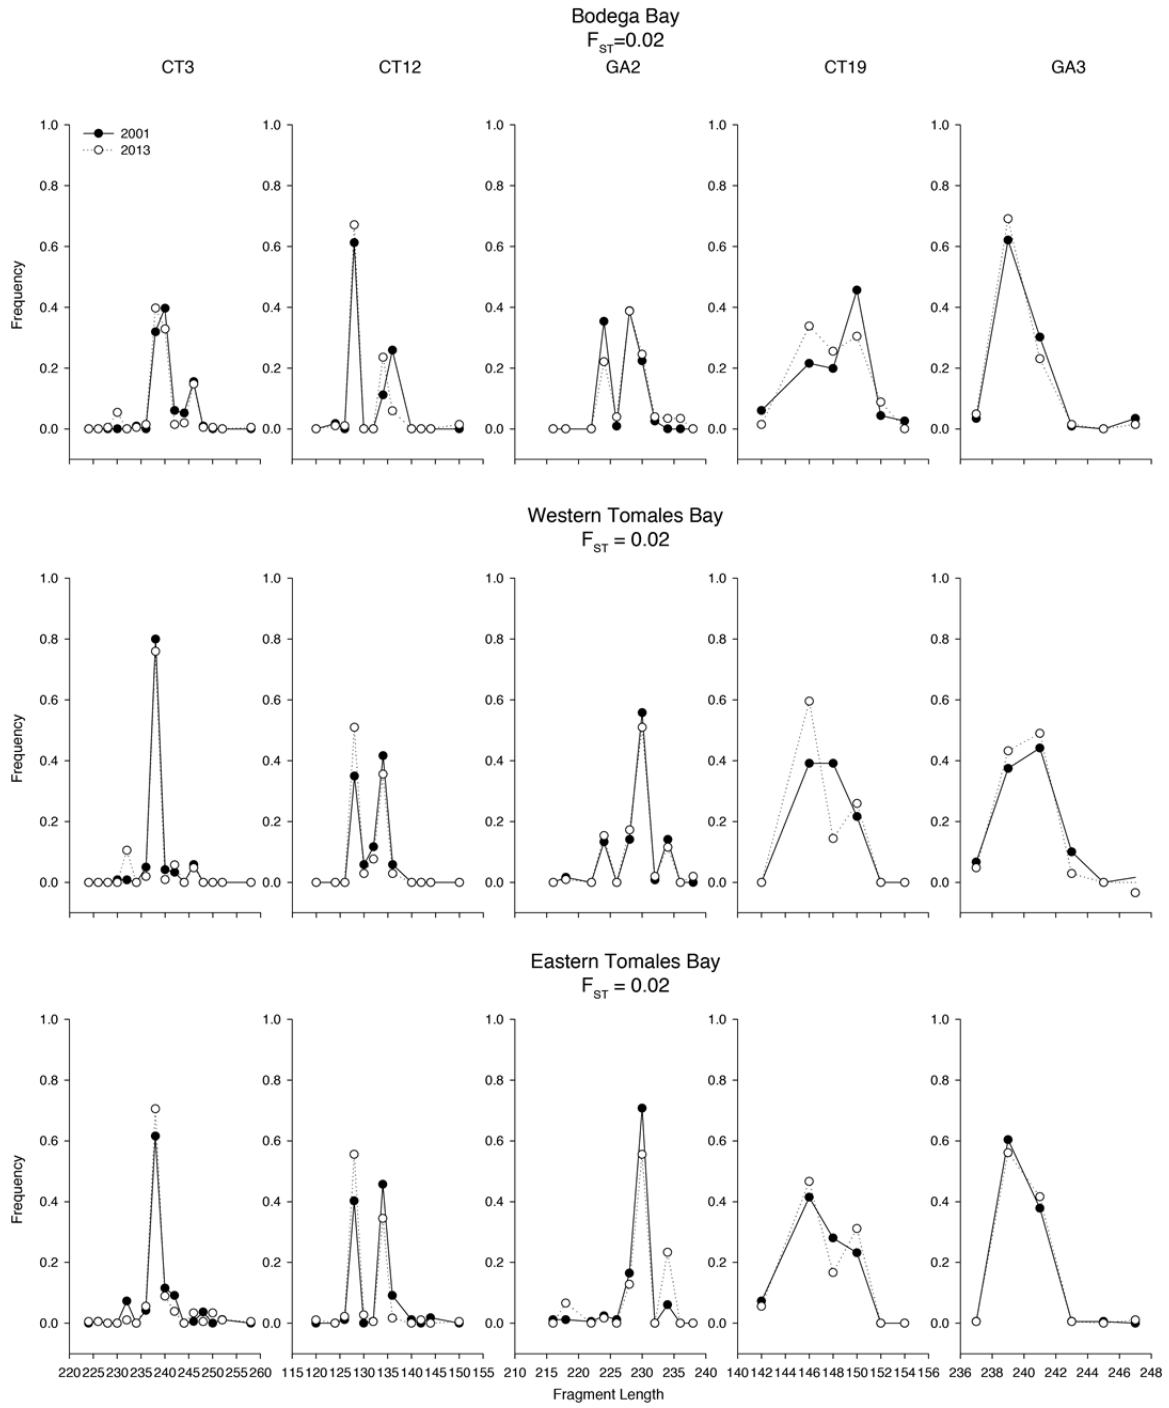

Fig. S2. *Zostera marina* allele frequencies at two sampling periods showing few differences among time periods.

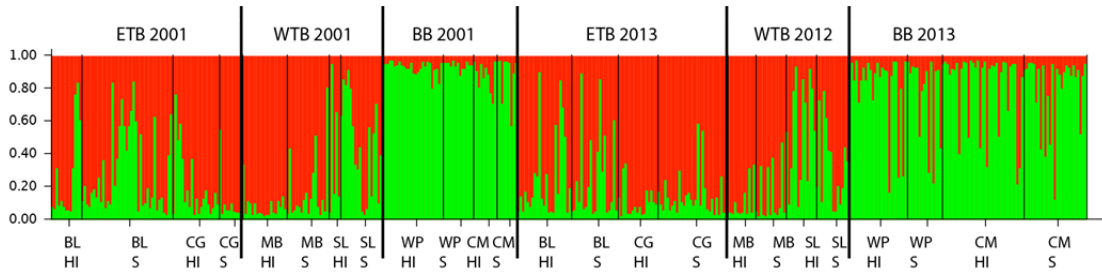

Fig. S3 *Zostera marina* Bayesian clustering using the program STRUCTURE from 3 regions (BB=Bodega Bay, ETB=East Tomales Bay, and WTB=West Tomales Bay) at two sampling periods showing few differences among times and consistent patterns among sites. BL=Blake's Landing, CG=Cypress Grove, MB=Marshall Beach, SL=Sacramento Landing, WP=Westside Park, CM=Channel Marker.

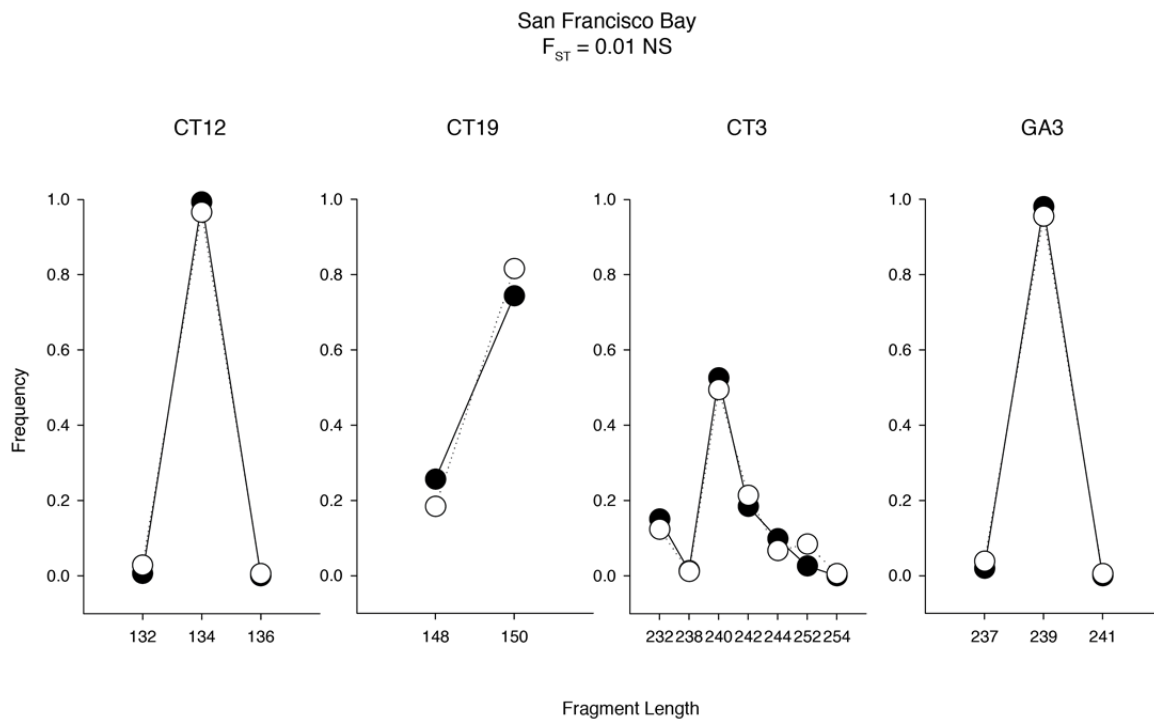

Fig. S4 *Zostera marina* allele frequencies at two sampling periods showing few differences among time periods.

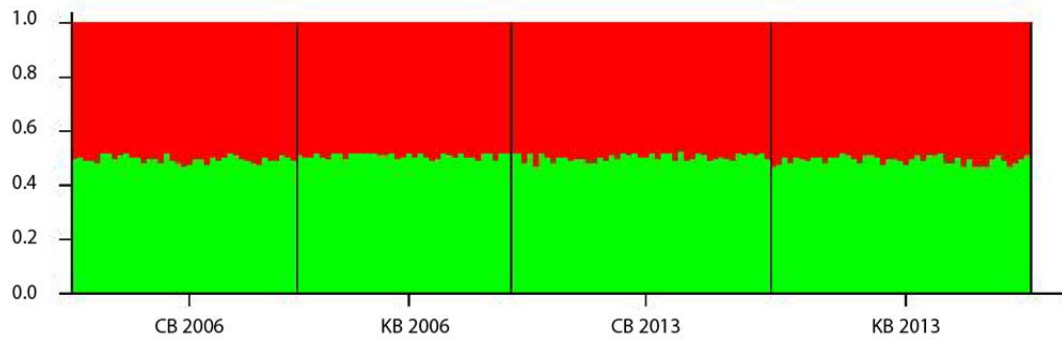

Fig. S5 *Zostera marina* Bayesian clustering using the program STRUCTURE from 2 meadows within San Francisco Bay (CB=Crown Beach, KB=Keller Beach) at two sampling periods showing few differences among times and consistent patterns among sites.

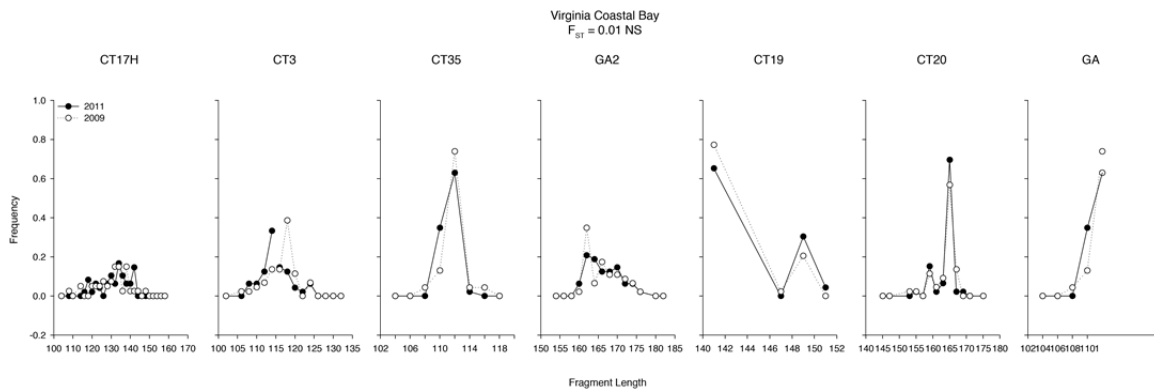

Fig. S6 *Zostera marina* allele frequencies at two sampling periods showing few differences among time periods.

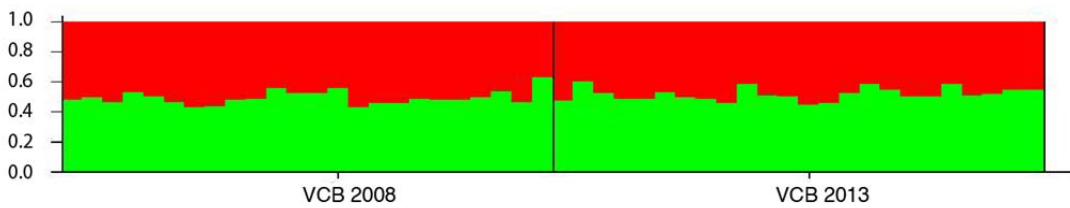

Fig. S7 *Zostera marina* Bayesian clustering using the program STRUCTURE from two sampling periods in the Virginia Coastal Bays showing few temporal differences.

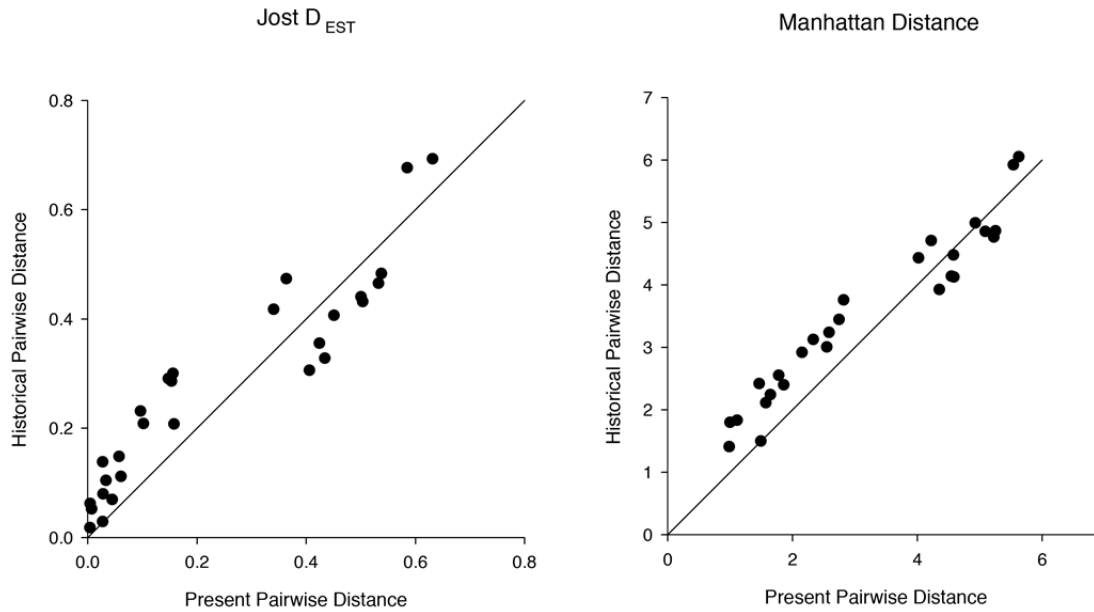

Fig. S8 *Zostera marina* population differentiation, estimated by  $D_{EST}$  and Manhattan distance (using 4 loci), between meadows in Bodega Bay, Tomales Bay, and San Francisco Bay did not change between two sampling times 6 to 12 years apart. Historical samples are from Kamel et al. 2012 and Ort et al. 2012. The reference line is a 1:1 line
